# Supplementary material
Source: PubMed Central journal article supplement (PMC7012665)
Supplement: NIHMS1538478-supplement-1.pdf [file NIHMS1538478-supplement-1.pdf]

## Online Repository Text

We modified the HEDIS definition: we used a rolling year, rather than calendar year, and we did not exclude people with other lung comorbidities (COPD, etc.). People with comorbid conditions are excluded from HEDIS cohorts because they are complicated, so may not be appropriate for inclusion in the denominator for HEDIS quality measures. For the purposes of this study, we elected to include them in order to describe the full use of asthma biologics in the population studied.

**Table E1**

| <b>Drug</b>  | <b>Code(s)</b>              | <b>Code Type</b> |
|--------------|-----------------------------|------------------|
| Benralizumab | C9466                       | HCPCS            |
| Dupilumab    | 00024591801,<br>00024591401 | NDC              |
| Mepolizumab  | C9473, J2182                | HCPCS            |
| Omalizumab   | J2357, C9217, S0107         | HCPCS            |
| Reslizumab   | C9481, J2786                | HCPCS            |
